## RESEARCH ARTICLE

# Validation of postnatal growth and retinopathy of prematurity (G-ROP) screening guidelines in a tertiary care hospital of Pakistan: A report from low-middle income country

Haroon Tayyab<sup>1☯\*</sup>, Adnan Mirza<sup>2☯</sup>, Roha Ahmad Choudhary<sup>3‡</sup>, Hassan Jabbar<sup>4‡</sup>, Mohammed Abbas Motiwala<sup>5‡</sup>, Sehrish Nizar Ali Momin<sup>1‡</sup>, Shiraz Hashmi<sup>6‡</sup>, Khadijah Abid<sup>1☯</sup>

**1** Department of Ophthalmology and Visual Sciences, The Aga Khan University Hospital, Karachi, Pakistan, **2** Department of Pediatrics, Neonatal medicine, The Aga Khan University Hospital, Karachi, Pakistan, **3** Clinical Research Fellow, Office of Dean, The Aga Khan University Hospital, Karachi, Pakistan, **4** Department of Pediatrics, The Aga Khan University Hospital, Karachi, Pakistan, **5** Medical College, The Aga Khan University Hospital, Karachi, Pakistan, **6** Department of Surgery, The Aga Khan University Hospital, Karachi, Pakistan

☯ These authors contributed equally to this work.

‡ RAC, HJ, MAM, SNAM, SH also contributed equally to this work.

\* [haroontayyab79@gmail.com](mailto:haroontayyab79@gmail.com)

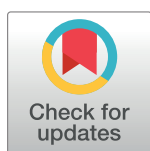

## OPEN ACCESS

**Citation:** Tayyab H, Mirza A, Choudhary RA, Jabbar H, Motiwala MA, Momin SNA, et al. (2024) Validation of postnatal growth and retinopathy of prematurity (G-ROP) screening guidelines in a tertiary care hospital of Pakistan: A report from low-middle income country. PLoS ONE 19(5): e0302534. <https://doi.org/10.1371/journal.pone.0302534>

**Editor:** Stefan Grosek, University Medical Centre Ljubljana (UMCL) / Faculty of Medicine, University Ljubljana (FM,UL), SLOVENIA

**Received:** September 15, 2023

**Accepted:** April 5, 2024

**Published:** May 9, 2024

**Peer Review History:** PLOS recognizes the benefits of transparency in the peer review process; therefore, we enable the publication of all of the content of peer review and author responses alongside final, published articles. The editorial history of this article is available here: <https://doi.org/10.1371/journal.pone.0302534>

**Copyright:** © 2024 Tayyab et al. This is an open access article distributed under the terms of the [Creative Commons Attribution License](https://creativecommons.org/licenses/by/4.0/), which permits unrestricted use, distribution, and reproduction in any medium, provided the original author and source are credited.

## Abstract

Retinopathy of Prematurity (ROP) significantly contributes to childhood blindness globally, with a disproportionately high burden in low- and middle-income countries (LMICs) due to improved neonatal care alongside inadequate ROP screening and treatment facilities. This study aims to validate the performance of Postnatal Growth and Retinopathy of Prematurity (G-ROP) screening criteria in a cohort of premature infants presenting at a tertiary care setting in Pakistan. This cross-sectional study utilized retrospective chart review of neonates admitted to the neonatal intensive care unit (NICU) at The Aga Khan University Hospital, Pakistan from January 2018 to February 2022. The complete G-ROP criteria were applied as prediction tool for infants with type 1 ROP, type 2 ROP, and no ROP outcomes. Out of the 166 cases, 125 cases were included in the final analysis, and remaining cases were excluded due to incomplete data. ROP of any stage developed in 83 infants (66.4%), of whom 55 (44%) developed type 1 ROP, 28 (22.4%) developed type 2 ROP, and 19 (15.2%) were treated for ROP. The median BW was 1060 gm (IQR = 910 to 1240 gm) and the median gestational age was 29 wk (IQR = 27 to 30 wk). The G-ROP criteria demonstrated a sensitivity of 98.18% (95% CI: 90.28–99.95%) for triggering an alarm for type 1 ROP. The G-ROP criteria achieved 100% sensitivity (95% CI: 87.66 to 100%) for type 2 ROP. The overall sensitivity of G-ROP criteria to trigger an alarm for any type of ROP was 98.8% (95% CI: 93.47 to 99.97%). Thus, the G-ROP screening model is highly sensitive in detecting at-risk infants for ROP in a Pakistani tertiary care setting, supporting its use in LMICs where standard screening criteria may not suffice.

**Data Availability Statement:** All relevant data are within the paper. Any other information related to data are available from the assistant manager in the department of ophthalmology and visual sciences, AKUH, Karachi, Pakistan. Email: [asif.hukma@aku.edu](mailto:asif.hukma@aku.edu).

**Funding:** The author(s) received no specific funding for this work.

**Competing interests:** The authors have declared that no competing interests exist.

## Introduction

Retinopathy of prematurity (ROP) is one of the leading causes of preventable loss of vision in premature babies worldwide and disproportionately affects premature babies in low- and middle-income countries (LMICs) like Pakistan [1]. Improved neonatal care in LMICs has undeniably led to a rise in the survival rates of preterm and low birth weight infants [2, 3]. However, a lack of understanding of the disease process, along with insufficient ROP diagnostic and treatment services, has put the LMICs at significant risk of threatening ROP [2, 3]. This situation has been termed as 3<sup>rd</sup> epidemic of ROP blindness, which has drawn attention to the urgent need for evidence-based screening and management strategies tailored to the local context [2].

A study conducted in 2018 revealed that more 40% of at-risk premature infants develop some stage of ROP, while 13% of these suffer severe ROP [4]. In United States, ROP is the 2<sup>nd</sup> leading cause of childhood blindness as well [5]. In Pakistan, a study conducted in Lahore in 2016 showed the prevalence of ROP to be 16% [6]. Another Pakistani study revealed that the high prevalence of ROP-related blindness is due to lack of awareness among neonatologists, an appropriate referral system and diagnostics [2].

Early detection and prompt intervention are crucial to prevent permanent vision loss from ROP [7]. In the US, standardized screening criteria according to the recommendations of American Academy of Pediatrics (AAP), American Academy of Ophthalmology (AAO), and American Association for Pediatric Ophthalmology and Strabismus (AAPOS) includes babies with a gestational age (GA) of 30 wk or less or birth weight (BW) of <1501 gm [7]. However, research from LMICs indicates that 66% of infants weighing less than 1,250 gm and 82% of those under 1,000 gm developed ROP, with 9% requiring treatment [8]. These findings suggest that the standard screening criteria may not be suitable for LMICs, where more mature and heavier infants are also at risk of developing ROP [9]. Gilbert et al. pointed out that using these standard criteria could result in missing 13% of infants who could potentially develop ROP in such settings [10].

In Pakistan, there is very limited data available on which to base recommendations for ROP screening criteria. Findings from two such studies conducted in advanced private NICUs indicate that infants weighing up to 1500 grams (gm) or with a gestational age of 32 weeks (wk) or less are at risk of developing severe ROP [11, 12]. Meanwhile, in other three studies, the characteristics of infants weighing up to 1500 gm or with a gestational age of 32 wk or less are at risk of developing severe ROP are not clarified [13–15]. Whereas, one study which applied wider criteria, stated that ROP did not occur in infants older than 32 wk gestational age and/or weighing more than 1500 gm [16]. However, these findings are not consistently replicated across different regions and healthcare settings, highlighting the need for further validation and standardization.

Given these inconsistencies, various screening criteria have been developed. Among them, one of the most explored and validated models is Postnatal Growth and Retinopathy of Prematurity (G-ROP) criteria, which was established using a large data base. Study has shown that the G-ROP criteria were able to identify all 459 infants who developed type 1 ROP with 100% sensitivity, simultaneously decreasing the number of infants requiring diagnostic retinal exams by 30% [17]. Although studies have demonstrated the effectiveness of the G-ROP model in high-income settings, but its validity and application in a LMICs like Pakistan remains unexplored. In light of the of varying socioeconomic diversity and healthcare infrastructure disparities across Pakistan, the selection of an appropriate study center is crucial where NICU and ROP care is standardized considering there are only two multidisciplinary tertiary care hospitals in Pakistan that are Joint Commission International (JCI) accredited. The

chosen tertiary care JCI hospital serves as a representative setting, catering to a diverse patient population and offering specialized neonatal and ophthalmological care. This setting provides an opportunity to assess the effectiveness of the G-ROP model in a real-world context, considering factors such as patient demographics, resource availability, and clinical expertise. Therefore, the objective of this study is to evaluate the validity of G-ROP model in identifying ROP cases successfully in a tertiary care hospital in Pakistan. By addressing the existing gaps in ROP screening practices and leveraging evidence-based approaches tailored to the local context, this research aims to contribute towards improving the prevention and management of ROP-related blindness in LMICs.

## Materials and methods

This cross-sectional study was conducted at the Aga Khan University Hospital (AKUH- JCI accredited), Karachi, Pakistan. A retrospective chart review of data obtained from the Health Information Management Services (HIMS) was performed from January 2018 to July 2022 of neonates admitted to the neonatal intensive care unit (NICU). These neonates were either received from the labour room of AKUH or from other hospitals. The sample size of 148 was estimated using NCSS Pass ver. 15 sample size calculator, by considering the sensitivity of G-ROP as 91% [18], specificity as 16.7% [18], prevalence of ROP in Pakistan as 27% [19], margin of error as 8.9%, and 95% confidence level. The calculated sample size was inflated by 10% for missing data and final sample size was 166 infants.

Charts for all neonates who underwent screening for ROP and had a known ROP outcome were reviewed based on BW and GA. In the primary analysis, we employed the screening criteria outlined in G-ROP. Infants were considered for examination if they met one or more of six criteria: GA < 28 wk, BW < 1051 g, weight gain < 120 gm during 10 to 19 days after birth, weight gain < 180 gm during 20 to 29 days after birth, weight gain < 170 gm during 30 to 39 days after birth, or hydrocephalus [20]. If criteria of GA or BW is not met, then the criteria for weight gain and hydrocephalus are investigated. If any one of these criteria is met, the infant undergoes a retinal examination; if none of the criteria are applicable, the infant does not undergo ROP screening examination.

Moverover, infants were considered to have a known ROP outcome if they were diagnosed type 1 ROP or type 2 ROP. Type 1 ROP was defined as any stage of ROP with plus disease or stage 3 ROP without plus disease in zone I, and stage 2 or 3 ROP with plus disease in zone II. Type 2 ROP was defined as stage 1 or 2 ROP without plus disease in zone I, and stage 3 ROP without plus disease in zone II. Neonates who were lost to follow-up (i.e. neonates who had a known ROP outcome but later did not follow in the clinic, and their treatment could not be ascertained) were excluded, as well as neonates who left against medical advice or were transferred or shifted to another hospital, or if neonatal mortality occurred during the NICU stay at our institute.

This study was carried out in accordance with the Helsinki Declaration. This study protocol was reviewed and approved by the Ethical Review Committee of The Aga Khan University Hospital, Karachi, Pakistan, with approval number 2021-6299-18532; issued on 07/07/2021. Informed consent was waived off by the Ethical Review Committee due to non-interventional retrospective chart review design of study and strict patient data confidentiality was ensured.

Data were collected in a pre-designed proforma, and files containing written inpatient and outpatient medical data were obtained. The following variables were extracted from the files: gender of baby, gestational age (wk), birth weight (gm), and hydrocephalus. For ROP eye examinations: data regarding the highest stage of ROP, lowest zone of ROP (I, II, or III); the presence or absence of plus disease and type of treatment were extracted. Certain risk factors

like Apgar score at 1 and 5 mins, mechanical ventilation, duration of oxygen supplementation (days), antenatal steroids, chorioamnionitis, congenital anomaly, intraventricular hemorrhage (IVH) grade 2–4, necrotizing enterocolitis (NEC) stage  $\geq$  II, bronchopulmonary dysplasia (BPD), culture proven sepsis, and duration of NICU stay (days) that play a part in the pathophysiology of ROP were selected, and the presence or absence of these risk factors were marked in the study proforma. In order to control the information bias, the extracted data was reviewed and validated by two independent investigators. Only principle investigator and co-investigators had the access to patient data.

Data was analyzed using SPSS (ver. 23) and Medcalc software (ver. 20.106). Normality of continuous variables was assessed on Shapiro–Wilk test and median and IQR were reported. Frequency and percentages for qualitative variables were calculated. Mann-Whitney U test or Chi-square test was applied for the comparison of baseline characteristics, risk factors, and G-ROP parameters between infants with any type of ROP (type 1 or type 2) and infants with no ROP. The performance of the G-ROP criteria was tested by calculating sensitivity and specificity for type 1 ROP, type 2 ROP and no ROP. The 95% confidence intervals (CIs) for measures of sensitivity and specificity were calculated for type 1 ROP, type 2 ROP, any type of ROP and treated ROP. Spearman's correlation test was applied to assess the relationship between BW and GA for type of ROP using G-ROP criteria and our hospital criteria. A p value of  $<0.05$  considered as significant.

## Results

The data for a total of 166 infants who stayed in the NICU at AKUH and had their eyes examined during the study period, i.e. from January 2018 to July 2022 were extracted. After exclusion of 37 cases due to incomplete data of weight gain ( $n = 35$ ) or absence of ROP outcome ( $n = 2$ ), the remaining 125 cases were included in the final analysis.

Out of 125 infants, ROP of any stage developed in 83 infants (66.4%), of whom 55 (44%) developed type 1 ROP, 28 (22.4%) developed type 2 ROP, and 19 (15.2%) were treated. Among the affected, 16 (12.8%) had stage 1 ROP, 24 (19.2%) had stage 2 ROP, 31 (24.8%) had stage 3 ROP, and 11 (8.8%) had aggressive posterior retinopathy of prematurity (APROP) in left eyes and 10 (8%) had stage 1 ROP, 27 (21.6%) had stage 2 ROP, 32 (25.6%) had stage 3 ROP, 1 (0.8%) had stage 4 ROP and 10 (8%) had APROP in right eyes. Intravitreal injection (Ranibizumab) was the most common treatment modality in treated infants (10 patients), followed by laser treatment in 3 infants and combined treatment in 6 infants.

Among the 125 infants studied, 54.2% were male and 45.8% were female. The overall median Apgar score was 7 at 1 minute and 8 at 5 minutes post-birth. The median duration of oxygen supplementation was 15 days, and the median stay in the NICU was 18 days. Mechanical ventilation was utilized in 64% of the infants, while antenatal steroids were administered to 41.6%. The occurrence of chorioamnionitis was noted in 16% of the cases, and congenital anomalies were observed in 3.2%. Other conditions such as IVH grade 2–4 were present in 14.4% of the infants, NEC stage  $\geq$  II in 4%, BPD in 15.2%, and culture-proven sepsis in 20%. Table 1 displays the segregation of baseline characteristics between the infants with and without ROP.

The median BW was 1060 gm (IQR = 910 to 1240) and the median gestational age was 29 wk (IQR = 27 to 30). About 49.6% of the infants had BW  $<1051$  gm and 30.4% had gestational age  $<28$  wk. About 45.6% of the neonates had weight gain  $<120$  gm (10–19 days), 53.6% had weight gain  $<180$  gm (20–29 days), and 32.8% had weight gain  $<170$  gm (30–39 days). About 12 infants had hydrocephalus. Parameters of G-ROP criteria with respect to ROP status and type are displayed in Table 2.

Table 1. Baseline characteristics and risk factors of infants with and without ROP (n = 125).

|                                   | ROP          |             | Total      | p-value <sup>+</sup> |
|-----------------------------------|--------------|-------------|------------|----------------------|
|                                   | Yes (n = 83) | No (n = 42) |            |                      |
| <b>Gender</b>                     |              |             |            |                      |
| Male                              | 45 (54.2)    | 26 (61.9)   | 71 (56.8)  | 0.412                |
| Female                            | 38 (45.8)    | 16 (38.1)   | 54 (43.2)  |                      |
| <b>Apgar score at 1 min</b>       | 7 (5–8)      | 6.5 (4–8)   | 7 (5–8)    | 0.171                |
| <b>Apgar score at 5 mins</b>      | 8 (7–9)      | 8 (7–9)     | 8 (7–9)    | 0.157                |
| <b>Duration of oxygen (days)</b>  | 15 (10–22)   | 14 (11–23)  | 15 (11–22) | 0.738                |
| <b>NICU stay (days)</b>           | 18 (15–30)   | 18 (16–31)  | 18 (15–30) | 0.632                |
| <b>Mechanical ventilation</b>     |              |             |            |                      |
| Yes                               | 51 (61.4)    | 29 (69)     | 80 (64)    | 0.403                |
| No                                | 32 (38.6)    | 13 (31)     | 45 (36)    |                      |
| <b>Antenatal steroids</b>         |              |             |            |                      |
| Yes                               | 36 (43.4)    | 16 (38.1)   | 52 (41.6)  | 0.572                |
| No                                | 47 (56.6)    | 26 (61.9)   | 73 (58.4)  |                      |
| <b>Chorioamnionitis</b>           |              |             |            |                      |
| Yes                               | 9 (10.8)     | 11 (26.2)   | 20 (16)    | 0.027                |
| No                                | 74 (89.2)    | 31 (73.8)   | 105 (84)   |                      |
| <b>Congenital anomalies</b>       |              |             |            |                      |
| Yes                               | 2 (2.4)      | 2 (4.8)     | 4 (3.2)    | 0.48                 |
| No                                | 81 (97.6)    | 40 (95.2)   | 121 (96.8) |                      |
| <b>IVH grade 2–4</b>              |              |             |            |                      |
| Yes                               | 13 (15.7)    | 5 (11.9)    | 18 (14.4)  | 0.572                |
| No                                | 70 (84.3)    | 37 (88.1)   | 107 (85.6) |                      |
| <b>NEC stage ≥ II</b>             |              |             |            |                      |
| Yes                               | 4 (4.8)      | 1 (2.4)     | 5 (4)      | 0.511                |
| No                                | 79 (95.2)    | 41 (97.6)   | 120 (96)   |                      |
| <b>Bronchopulmonary dysplasia</b> |              |             |            |                      |
| Yes                               | 11 (13.3)    | 8 (19)      | 19 (15.2)  | 0.394                |
| No                                | 72 (86.7)    | 34 (81)     | 106 (84.8) |                      |
| <b>Culture proven sepsis</b>      |              |             |            |                      |
| Yes                               | 16 (19.3)    | 9 (21.4)    | 25 (20)    | 0.755                |
| No                                | 67 (80.7)    | 33 (78.6)   | 100 (80)   |                      |

Data is presented as Median (Q1–Q3) or n (%)

<sup>+</sup>Mann-Whitney U test or Chi-square test was applied for the comparison of G-ROP parameters between infants with any type of ROP (type 1 or type 2) and infants with no ROP.

<https://doi.org/10.1371/journal.pone.0302534.t001>

Table 3 shows the diagnostic accuracy of G-ROP criteria for detecting different types of ROP, including Type 1 ROP, Type 2 ROP, any type of ROP, and treated ROP. By applying G-ROP criteria (any of the six criteria in an orderly manner) for screening, 123 infants out of 125 infants were flagged for ROP screening. The sensitivity of G-ROP was 98.18% for Type 1 ROP (95% CI: 90.28% to 99.95%), 100% for Type 2 ROP (95% CI: 87.66% to 100.00%), 98.8% for any type of ROP (95% CI: 93.47% to 99.97%). One baby, having BW of 1150 gm and GA of 29 wk with no remaining G-ROP criteria developed stage 2 in zone 2 with no plus disease. The disease eventually reversed, and the baby did not receive any treatment, with full growth of the retina without sequelae. No additional risk factors were identified for this baby. Nineteen babies received treatment for ROP at AKUH, whereas, rest of the babies chose to have



Table 2. G-ROP parameters of infants with and without ROP (n = 125).

|                                             | ROP             |                  | No ROP          | Overall         | p-value <sup>+</sup> |
|---------------------------------------------|-----------------|------------------|-----------------|-----------------|----------------------|
|                                             | Type I          | Type II          |                 |                 |                      |
| <b>GA (wk)</b>                              | 28 (27–29)      | 29 (27.5–29.5)   | 29 (27–30)      | 29 (27–30)      | 0.168                |
| <b>GA &lt; 28 wk</b>                        |                 |                  |                 |                 |                      |
| Yes                                         | 19 (34.5)       | 7 (25)           | 12 (28.6)       | 38 (30.4)       | 0.752                |
| No                                          | 36 (65.5)       | 21 (75)          | 30 (71.4)       | 87 (69.6)       |                      |
| <b>BW (gm)</b>                              | 1020 (815–1150) | 1170 (1010–1280) | 1050 (900–1250) | 1060 (910–1240) | 0.865                |
| <b>BW &lt; 1050 gm</b>                      |                 |                  |                 |                 |                      |
| Yes                                         | 31 (56.4)       | 10 (35.7)        | 21 (50)         | 63 (50.4)       | 0.949                |
| No                                          | 24 (43.6)       | 18 (64.3)        | 21 (50)         | 62 (49.6)       |                      |
| <b>Weight gain &lt; 120 gm (10–19 days)</b> |                 |                  |                 |                 |                      |
| Yes                                         | 29 (52.7)       | 14 (50)          | 14 (33.3)       | 57 (45.6)       | 0.05                 |
| No                                          | 26 (47.3)       | 14 (50)          | 28 (66.7)       | 68 (54.4)       |                      |
| <b>Weight gain &lt; 180 gm (20–29 days)</b> |                 |                  |                 |                 |                      |
| Yes                                         | 31 (56.4)       | 12 (42.9)        | 24 (57.1)       | 67 (53.6)       | 0.572                |
| No                                          | 24 (43.6)       | 16 (57.1)        | 18 (42.9)       | 58 (46.4)       |                      |
| <b>Weight gain &lt; 170 gm (30–39 days)</b> |                 |                  |                 |                 |                      |
| Yes                                         | 19 (34.5)       | 10 (35.7)        | 12 (28.6)       | 41 (32.8)       | 0.474                |
| No                                          | 36 (65.5)       | 18 (64.3)        | 30 (71.4)       | 84 (67.2)       |                      |
| <b>Hydrocephalus</b>                        |                 |                  |                 |                 |                      |
| Yes                                         | 7 (12.7)        | 3 (10.7)         | 2 (4.8)         | 12 (9.6)        | 0.191                |
| No                                          | 48 (87.3)       | 25 (89.3)        | 40 (95.2)       | 113 (90.4)      |                      |

Data is presented as Median (Q1–Q3) or n (%)

<sup>+</sup>Mann-Whitney U test or Chi-square test was applied for the comparison of G-ROP parameters between infants with any type of ROP (type 1 or type 2) and infants with no ROP.

<https://doi.org/10.1371/journal.pone.0302534.t002>

treatment at other facilities due to various reasons (financials and proximity to their home-town). The G-ROP criteria demonstrated 100% sensitivity (95% CI: 82.35% to 100.00%) for all treatments requiring babies, and no baby was missed in this model.

Fig 1 shows the relation between GA and BW with respect to type of ROP. The green line shows the cut-off for BW (<1050 gm) and GA ( $\leq$ 28 wk), whereas the orange line shows the cut-offs of BW (<1500 gm) and GA ( $\leq$ 30 wk). Birth weight generally increased with gestational age for Type I ( $r = 0.460$ ,  $p = 0.001$ ) and Type II ROP ( $r = 0.538$ ,  $p = 0.001$ ). Furthermore, the Type I infants tend to have higher birth weights than the Type 2 infants at all gestational ages. In birth gain criteria, only two babies were missed but none of them needed treatment. Thus, the G-ROP screening criteria are more stringent as compared to hospital criteria.

Table 3. Diagnostic accuracy of G-ROP criteria for any type of ROP (I or II), type I ROP, type II ROP and Treated ROP (n = 125).

| Statistic                 | Type 1 ROP             | Type 2 ROP             | Any type of ROP        | Treated ROP            |
|---------------------------|------------------------|------------------------|------------------------|------------------------|
|                           | % (95% CI)             | % (95% CI)             | % (95% CI)             | % (95% CI)             |
| Sensitivity               | 98.18 (90.28 to 99.95) | 100 (87.66 to 100.00)  | 98.8 (93.47 to 99.97)  | 100 (82.35 to 100.00)  |
| Specificity               | 1.43 (0.04 to 7.70)    | 2.06 (0.25 to 7.25)    | 2.38 (0.06 to 12.57)   | 1.89 (0.23 to 6.65)    |
| Positive Predictive Value | 43.9 (42.78 to 45.03)  | 22.76 (22.26 to 23.28) | 66.67 (65.48 to 67.83) | 15.45 (15.11 to 15.80) |
| NPV                       | 50 (6.01 to 93.99)     | 100 (15.81 to 100.00)  | 50 (6.03 to 93.97)     | 100 (15.81 to 100.00)  |
| Accuracy                  | 44 (35.14 to 53.16)    | 24 (16.82 to 32.46)    | 66.4 (57.40 to 74.60)  | 16.8 (10.71 to 24.53)  |

<https://doi.org/10.1371/journal.pone.0302534.t003>

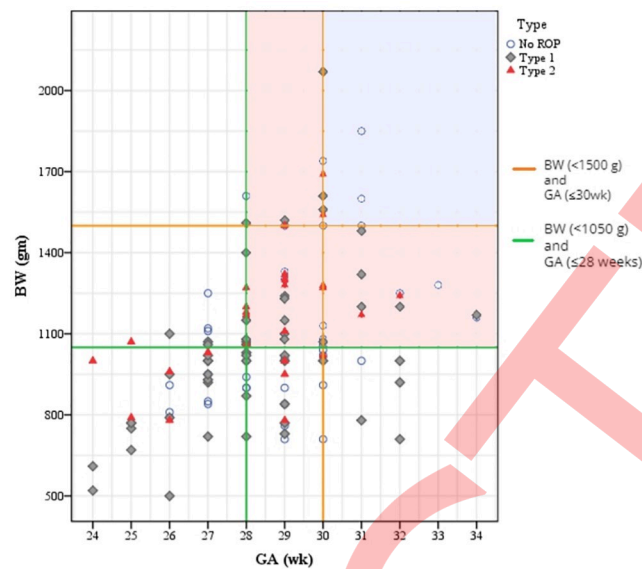

**Fig 1. Scatter plot based on GA (wk) and BW (gm) of infants with type 1 ROP, type 2 ROP or no ROP.**

<https://doi.org/10.1371/journal.pone.0302534.g001>

## Discussion

ROP presents a significant risk of vision loss in premature infants, emphasizing the critical need for early identification and intervention to prevent blindness [21]. The foundation of this battle against ROP lies in the deployment of screening protocols that accurately identify infants at risk [22]. This necessitates the development and application of evidence-based, region-specific strategies for screening and management to tackle ROP with greater precision. Thus, our research undertook the validation of the G-ROP model within a tertiary care setting in Pakistan, aiming to refine the detection and treatment process for ROP.

G-ROP screening model was established by Binenbaum et al. in 2018 after a multicenter retrospective study with a large sample size ( $n = 7483$ ) across 29 facilities in North America. Apart from GA and BW, the gain of weight at three-time intervals along with the presence or absence of hydrocephalus was used as a predictor for screening. Any premature infant triggering any criteria was included in screening. In their internal validation, they showed 100% sensitivity for predicting type 1 ROP (459/459) and 98.7% sensitivity for type 2 ROP (466/472). They also demonstrated 100% sensitivity for treated ROP (524/524) [17].

Although the sample size in our study population was only 125, we noted high sensitivity as 98.18% (CI 95%: 90.2–99.95%) for type 1 ROP, 100% (CI 95%: 87.66–100%) for type 2 ROP, and 98.8% (CI 95%: 93.47–99.97%) for any type of ROP (Type 1 or 2). Only 19 babies received treatment from our facility, but an alarm was triggered in all of them when screened through the G-ROP criteria. Furthermore, identification of one baby with ROP not requiring treatment that could be missed by the screening criteria emphasizes the inherent limitations and potential areas for refinement in the G-ROP criteria, especially pertinent in resource-constrained settings aiming for high-efficiency screening. This case illustrates the intrinsic challenge of achieving 100% sensitivity in ROP screening, highlighting a core dilemma: the imperative to detect all at-risk infants while avoiding the strain of excessive screenings on healthcare systems. Despite the high sensitivity of the G-ROP criteria, this instance reveals the shortcoming of any screening protocol and underscores the importance of continuous re-evaluation and possible adjustment of criteria to ensure the inclusion of all potential ROP cases, even those less severe.

In a similar study by Fadakar et al. from Iran, it was shown that G-ROP screening criteria can achieve a sensitivity of 97.6%, and of 36 infants without ROP, whereas 3 infants were correctly excluded (specificity = 8.3%). The G-ROP criteria did not fail to identify infants who required treatment for ROP (sensitivity, 100%) and had a specificity of 8.69% [1]. A similar study from Egypt applied the G-ROP model to 605 premature infants and reported 100% sensitivity with a median GA of 31.5 wk and median BW of 1200 gm. Although the medians reported in this cohort are higher than in our report, but the sensitivity results are the same. These are very close to the results when comparing outcomes in LMICs [23].

In further testing of G-ROP criteria, the validation of a large sample size from North America showed that increasing the three intervals of weight gain to 180 gm achieved the same sensitivity (the G-ROP criteria correctly predicted 219 of 219 cases of type 1 ROP with sensitivity as 100%; 95% CI = 98.3%-100%, while reducing the number of infants undergoing examinations by 35.6%) [24] as reported in the original study by Binenbaum et al. in 2018 [17] whereas in a Taiwanese cohort of 303 babies, they achieved 96.6% sensitivity when screening according to G-ROP criteria and their sensitivity increased to 100% when three weight gain periods were simplified to 180 gm each [25]. This is one of the two reports from Far East Asia where the conventional G-ROP model did not show 100% sensitivity. The other report is from China where Yang et al. reported 96% sensitivity for G-ROP screening criteria for type 1 ROP and 74.8% for any ROP. This is lower than our reported 98.7% sensitivity for any ROP and 100% sensitivity for type 1 ROP. The author relates this lower sensitivity to artificial weight gain (abdominal distension) during that period, which may reflect the true IGF levels.<sup>25</sup> In current study, we did not increase the weight gain to 180 because we achieved high sensitivity through the original G-ROP criteria.

While Shiraki et al. from Japan showed that G-ROP screening criteria can achieve 100% sensitivity in treated ROP and at the same time reduce the number of screening visits by 24.5%. In their cohort of 537 infants, the median BW was 986 gm and median GA was 29.1 wk [26]. Similar cohorts from UK (n = 605) and Italy (n = 475) showed 100% sensitivity when applying G-ROP criteria in their respective populations for type 1 ROP and treated ROP. Despite both being European countries, the median GA of the cohort from UK was 29 wk compared to 30.4 wk from Italy. Similarly, the median BW in the cohort from UK was 1010 gm as opposed to 1300 gm in Italy. Nevertheless, the G-ROP performance was comparable in terms of sensitivity for type 1 ROP [23, 27].

In one of the studies from Turkey, they demonstrated a sensitivity of 91.2% for any ROP and 88.3% for treated ROP. These scores are lower than what we reported in our cohort. In this cohort of 242 preterm infants, their mean GA was 29.5 wk and mean BW was 1303.4 gm which was higher when compared to our observations (mean GA = 28.4 wk; mean BW = 1053.6 gm) [28]. These results are interesting because of the higher mean BW and GA being associated with lower sensitivities when checked with criteria having low weight and weight gain rates as predictors.

In LMICs, the epidemiology of ROP is different than that in high-income countries [29, 30]. Whereas infants born with BW greater than 1500 gm or after 30 wk of gestation are not screened in the US, heavier and older infants remain at risk for ROP in LMICs [21, 31]. Our findings reveal a notably high prevalence of ROP, with 66.4% of infants having any type of ROP (44% had Type 1 ROP and 22.4% had Type 2). This elevated incidence is closely linked to prolonged stays in the NICU for infants presenting with more severe initial health challenges, as indicated by their lower median GA and BW. Another factor for higher ROP incidence is referral of sicker babies from outside AKUH (mostly from maternity homes and small scale facilities with inappropriate oxygen use). The finance and logistic issues were also evident from the observation that despite 55 babies having type 1 ROP, only 19 (34.54%) babies agreed to receive treatment from our hospital (a tertiary care private owned hospital).



Similarly, in other LMICs like Brazil, the incidence of ROP is reported as 44.5% [32]. Another Brazilian study reported the incidence of any type of ROP as 33.9% [33]. In India, the incidence of ROP varies across different regions range from 38% to 47% [21, 34]. A systematic review conducted at regional and global level in 2010 found that out of 184,700 babies affected with any stage of ROP, 20,000 babies become blind and 12,300 of them had moderate visual impairment. Among them 65% of visually impaired infants were from middle-income regions and 6.2% (4.3–8.9%) of all ROP visually impaired infants were born at >32-week gestation [35]. Studies from Pakistan indicated incidence of ROP as 10.5% to 32.4% [13, 29]. Thus, the adaptation of screening criteria to include older and heavier infants is a consideration gaining attraction among ophthalmologists in LMICs, driven by advancements in NICU care capabilities which, despite improving survival rates, often lack in advanced oxygen monitoring and delivery systems. This adaption might aligns with observations made in the Philippines, where applying US screening standards would have led to a missed diagnosis in 16.2% of infants with ROP, highlighting the importance of localized screening protocols in capturing the full spectrum of ROP risk within diverse populations [21].

The study's primary strength is its utilization of a large dataset from a LMIC, and offering vital insights into the prevalence and detection of ROP in environments where related research is notably scarce. Demonstrating high sensitivity in identifying at-risk infants, the G-ROP criteria underscore its relevance and potential for broader implementation in comparable LMIC scenarios. Enhanced by a detailed data collection process through retrospective chart reviews over an extensive 4.5-year period, the study robustly evaluates the G-ROP model's effectiveness. Despite these strengths, the retrospective nature of the study inherently introduces potential biases, predominantly due to its reliance on historical medical records, which may lack completeness or accuracy. This limitation, evidenced by the exclusion of certain cases due to incomplete data, could influence the study's outcomes. Nevertheless, these biases are partially offset by the extensive sample size and the thorough approach to data collection, aimed at encompassing all pertinent cases within the study timeframe. Efforts to mitigate information bias were made through a standardized protocol for data collection and the involvement of multiple reviewers for chart analyses. However, the low specificity observed in the G-ROP criteria raises concerns about the potential increase in unnecessary screenings and the consequent burden on resources, especially critical in resource-constrained settings. Furthermore, concentrating the study within a single tertiary care hospital may restrict the findings' applicability across Pakistan and other LMICs, underlining the necessity for validation across diverse healthcare contexts. Although the study acknowledges the intricacies of ROP's pathogenesis and incorporates an analysis of various confounding factors, such as gestational age, birth weight, and NICU interventions, its retrospective design inherently limits comprehensive control over all potential confounders.

In summary, while the study significantly contributes to our understanding of ROP screening in LMICs by validating the G-ROP criteria, it concurrently emphasizes the imperative for future research—specifically, prospective, multi-center studies. Such research is essential not only to refine these criteria and enhance specificity but also to guarantee the criteria's wider applicability. Achieving this goal is paramount in preventing childhood blindness due to ROP across a spectrum of global settings.

## Conclusion

The study successfully validated the effectiveness of the G-ROP screening criteria in a tertiary care setting in Pakistan, demonstrating high sensitivity in detecting at-risk infants for ROP. These findings support the potential utility of the G-ROP model in LMICs, where standard

screening criteria may not adequately capture the at-risk population due to differences in neonatal care and ROP epidemiology. However, the challenges posed by low specificity and the limitations of a single-center retrospective design highlight the need for further research. Specifically, efforts should focus on refining screening criteria to improve specificity, conducting prospective and multi-center studies to enhance generalizability, and exploring innovative strategies to implement effective ROP screening in resource-limited settings. Ultimately, improving ROP screening practices in LMICs could significantly contribute to preventing childhood blindness and optimizing visual outcomes for premature infants at risk of ROP.

## Author Contributions

**Conceptualization:** Haroon Tayyab, Adnan Mirza, Khadijah Abid.

**Data curation:** Roha Ahmad Choudhary, Mohammed Abbas Motiwala, Khadijah Abid.

**Formal analysis:** Sehrish Nizar Ali Momin, Shiraz Hashmi, Khadijah Abid.

**Investigation:** Khadijah Abid.

**Methodology:** Haroon Tayyab, Khadijah Abid.

**Project administration:** Haroon Tayyab.

**Software:** Khadijah Abid.

**Validation:** Khadijah Abid.

**Visualization:** Khadijah Abid.

**Writing – original draft:** Hassan Jabbar.

**Writing – review & editing:** Adnan Mirza, Hassan Jabbar, Khadijah Abid.

## References

1. Fadakar K, Abbas H, Soltani Shahgoli S, Tuli S, Farahani A, Imani Fooladi M, et al. Validation of the Postnatal Growth and Retinopathy of Prematurity (GROP) screening criteria. *Med Hypothesis Discov Innov Ophthalmol* 2022; 11(2):77–84. PMID: [37641787](https://pubmed.ncbi.nlm.nih.gov/37641787/)
2. Mian UK, Hashmi F, Chaudhry T, Ahmad K. Retinopathy of prematurity and Pakistan; an epidemic coming. *Pakistan Journal of Ophthalmology* 2014; 30(2).
3. Jańczewska I, Wierzbą J, Jańczewska A, Szczurek-Gierczak M, Domzalska-Popadiuk I. Prematurity and Low Birth Weight and Their Impact on Childhood Growth Patterns and the Risk of Long-Term Cardiovascular Sequelae. *Children (Basel)* 2023; 10(10). <https://doi.org/10.3390/children10101599> PMID: [37892262](https://pubmed.ncbi.nlm.nih.gov/37892262/)
4. Quinn GE, Ying GS, Bell EF, Donohue PK, Morrison D, Tomlinson LA, Binenbaum G. Incidence and Early Course of Retinopathy of Prematurity: Secondary Analysis of the Postnatal Growth and Retinopathy of Prematurity (G-ROP) Study. *JAMA Ophthalmol* 2018; 136(12):1383–9. <https://doi.org/10.1001/jamaophthalmol.2018.4290> PMID: [30326046](https://pubmed.ncbi.nlm.nih.gov/30326046/)
5. Bashinsky AL. Retinopathy of Prematurity. *N C Med J* 2017; 78(2):124–8. <https://doi.org/10.18043/ncm.78.2.124> PMID: [28420777](https://pubmed.ncbi.nlm.nih.gov/28420777/)
6. Sadiq MAA, Karamat I, Khan AA. Retinopathy of prematurity in Pakistan. *Journal of American Association for Pediatric Ophthalmology and Strabismus* 2016; 20(6):541–2. <https://doi.org/10.1016/j.jaapos.2016.09.016> PMID: [27826064](https://pubmed.ncbi.nlm.nih.gov/27826064/)
7. Sobhy M, Cole E, Jabbehdari S, Valikodath NG, Al-Khaled T, Kalinoski L, et al. Operationalization of Retinopathy of Prematurity Screening by the Application of the Essential Public Health Services Framework. *Int Ophthalmol Clin* 2023; 63(1):39–63. <https://doi.org/10.1097/IIO.0000000000000448> PMID: [36598833](https://pubmed.ncbi.nlm.nih.gov/36598833/)
8. Nair A, El Ballushi R, Anklesaria BZ, Kamali M, Talat M, Watts T. A Review on the Incidence and Related Risk Factors of Retinopathy of Prematurity Across Various Countries. *Cureus* 2022; 14(11): e32007. <https://doi.org/10.7759/cureus.32007> PMID: [36589197](https://pubmed.ncbi.nlm.nih.gov/36589197/)

9. Gilbert C, Fielder A, Gordillo L, Quinn G, Semiglia R, Visintin P, et al. Characteristics of infants with severe retinopathy of prematurity in countries with low, moderate, and high levels of development: implications for screening programs. *Pediatrics* 2005; 115(5):e518–25. <https://doi.org/10.1542/peds.2004-1180> PMID: 15805336
10. Mian UK. Retinopathy of Prematurity and Pakistan; an Epidemic Coming. *Pak J Ophthal* 2014.
11. Jamil AZ, Tahir MY, Ayub MH, Mirza KA. Features of retinopathy of prematurity in a tertiary care hospital in Lahore. *J Pak Med Assoc* 2015; 65(2):156–8. PMID: 25842550
12. Taqui AM, Syed R, Chaudhry TA, Ahmad K, Salat MS. Retinopathy of prematurity: frequency and risk factors in a tertiary care hospital in Karachi, Pakistan. *J Pak Med Assoc* 2008; 58(4):186–90. PMID: 18655427
13. Sohaila A, Tikmani SS, Khan IA, Atiq H, Akhtar AS, Kumar P, et al. Frequency of retinopathy of prematurity in premature neonates with a birth weight below 1500 grams and a gestational age less than 32 weeks: a study from a tertiary care hospital in a lower-middle income country. . . . *PLoS One* 2014; 9(7): e100785. <https://doi.org/10.1371/journal.pone.0100785> PMID: 24987962
14. Khalid A, Haider A, Fatima N, Tahira F, Amna SL. Retinopathy of prematurity; An experience at a tertiary care hospital. *Pak Pediatr J* 2017; 41(2):97–102.
15. Riaz M, Rafique S, Hina A, Bashir M, Majeed MT, Maqbool S. Frequency and risk factors of retinopathy of prematurity in preterm babies at a tertiary care hospital in Lahore. *Journal of Fatima Jinnah Medical University* 2019; 13(3):110–5.
16. Chaudhry TA, Hashmi FK, Salat MS, Khan QA, Ahad A, Taqui AM, et al. Retinopathy of prematurity: an evaluation of existing screening criteria in Pakistan. *Br J Ophthalmol* 2014; 98(3):298–301. <https://doi.org/10.1136/bjophthalmol-2013-304018> PMID: 24344233
17. Binenbaum G, Tomlinson LA, de Alba Campomanes AG, Bell EF, Donohue P, Morrison D, et al. Validation of the postnatal growth and retinopathy of prematurity screening criteria. *JAMA ophthalmology* 2020; 138(1):31–7. <https://doi.org/10.1001/jamaophthalmol.2019.4517> PMID: 31725856
18. Almeida AC, Sandinha T, Azevedo R, Brízido M, Figueiredo M, Coelho C, et al. Retrospective comparison between growth and retinopathy of prematurity model versus WINROP model. *Can J Ophthalmol* 2022; 57(1):58–64. <https://doi.org/10.1016/j.cjco.2021.02.030> PMID: 33775593
19. Rauf A, Saigol HK, Chauhan K, Akbar S, Chaudhary NI. Prevalence of Retinopathy of Prematurity in Premature Neonates Visiting Sir Gangaram Hospital Lahore. *Pakistan Journal of Medical & Health Sciences* 2023; 17(02):206–.
20. Vinayahalingam N, McDougall J, Ahrens O, Ebnetter A. Retrospective validation of the postnatal Growth and Retinopathy of Prematurity (G-ROP) criteria in a Swiss cohort. *BMC Ophthalmology* 2022; 22(1):19. <https://doi.org/10.1186/s12886-021-02227-4> PMID: 35012498
21. Bowe T, Nyamai L, Ademola-Popoola D, Amphornphruet A, Anzures R, Cernichiaro-Espinosa LA, et al. The current state of retinopathy of prematurity in India, Kenya, Mexico, Nigeria, Philippines, Romania, Thailand, and Venezuela. *Digit J Ophthalmol* 2019; 25(4):49–58. <https://doi.org/10.5693/djo.01.2019.08.002> PMID: 32076388
22. Wade KC, Ying G-s, Baumritter A, Gong A, Kemper AR, Quinn GE, Group e-RC. Factors in premature infants associated with low risk of developing retinopathy of prematurity. *JAMA ophthalmology* 2019; 137(2):160–6. <https://doi.org/10.1001/jamaophthalmol.2018.5520> PMID: 30452500
23. Ahmed ISH, Aclimandos W, Azad N, Zaheer N, Barry JS, Ambulkar H, et al. The Postnatal Growth and Retinopathy of Prematurity Model: A Multi-institutional Validation Study. *Ophthalmic Epidemiol* 2022; 29(3):296–301. <https://doi.org/10.1080/09286586.2021.1939885> PMID: 34139931
24. Binenbaum G, Tomlinson LA, de Alba Campomanes AG, Bell EF, Donohue P, Morrison D, et al. Validation of the Postnatal Growth and Retinopathy of Prematurity Screening Criteria. *JAMA Ophthalmol* 2020; 138(1):31–7. <https://doi.org/10.1001/jamaophthalmol.2019.4517> PMID: 31725856
25. Huang CW, Yeh PT, Tsao PN, Chou HC, Chen CY, Yen TA, et al. Validation of the Postnatal Growth and Retinopathy of Prematurity Screening Criteria in a Taiwanese Cohort. *Am J Ophthalmol* 2022; 237:22–31. <https://doi.org/10.1016/j.ajo.2021.11.007> PMID: 34780799
26. Shiraki A, Fukushima Y, Kawasaki R, Sakaguchi H, Mitsuhashi M, Ineyama H, et al. Retrospective Validation of the Postnatal Growth and Retinopathy of Prematurity (G-ROP) Criteria in a Japanese Cohort. *Am J Ophthalmol* 2019; 205:50–3. <https://doi.org/10.1016/j.ajo.2019.03.027> PMID: 30954468
27. Caruggi S, Scaramuzzi M, Calevo MG, Priolo E, Sposetti L, Camicione P, et al. Validation of the postnatal growth and retinopathy of prematurity screening criteria: A retrospective Italian analysis. *Eur J Ophthalmol* 2021; 11206721211011362. <https://doi.org/10.1177/11206721211011362> PMID: 33887976
28. Yabas Kiziloglu O, Coskun Y, Akman I. Assessment of the G-ROP study criteria for predicting retinopathy of prematurity: results from a tertiary centre in Turkey. *Int Ophthalmol* 2020; 40(7):1647–52. <https://doi.org/10.1007/s10792-020-01332-5> PMID: 32200507

29. Taqui AM, Syed R, Chaudhry TA, Ahmad K, Salat MS. Retinopathy of prematurity: frequency and risk factors in a tertiary care hospital in Karachi, Pakistan. *Journal of the Pakistan Medical Association* 2008; 58(4):186. PMID: [18655427](#)
30. Vinekar A, Gilbert C, Dogra M, Kurian M, Shainesh G, Shetty B, Bauer N. The KIDROP model of combining strategies for providing retinopathy of prematurity screening in underserved areas in India using wide-field imaging, tele-medicine, non-physician graders and smart phone reporting. *Indian J Ophthalmol* 2014; 62(1):41–9. <https://doi.org/10.4103/0301-4738.126178> PMID: [24492500](#)
31. Shukla R, Murthy GVS, Gilbert C, Vidyadhar B, Mukpalkar S. Operational guidelines for ROP in India: A summary. *Indian J Ophthalmol* 2020; 68(Suppl 1):S108–s14. [https://doi.org/10.4103/ijo.IJO\\_1827\\_19](https://doi.org/10.4103/ijo.IJO_1827_19) PMID: [31937744](#)
32. Gonçalves E, Nasser LS, Martelli DR, Alkmim IR, Mourão TV, Caldeira AP, et al. Incidence and risk factors for retinopathy of prematurity in a Brazilian reference service. *Sao Paulo Med J* 2014; 132(2):85–91. <https://doi.org/10.1590/1516-3180.2014.1322544> PMID: [24714988](#)
33. Freitas AM, Mörschbacher R, Thorell MR, Rhoden EL. Incidence and risk factors for retinopathy of prematurity: a retrospective cohort study. *International Journal of Retina and Vitreous* 2018; 4(1):20. <https://doi.org/10.1186/s40942-018-0125-z> PMID: [29881640](#)
34. Chattopadhyay MP, Pradhan A, Singh R, Datta S. Incidence and risk factors for retinopathy of prematurity in neonates. *Indian Pediatr* 2015; 52(2):157–8. <https://doi.org/10.1007/s13312-015-0594-1> PMID: [25691191](#)
35. Blencowe H, Lawn JE, Vazquez T, Fielder A, Gilbert C. Preterm-associated visual impairment and estimates of retinopathy of prematurity at regional and global levels for 2010. *Pediatr Res* 2013; 74 Suppl 1 (Suppl 1):35–49. <https://doi.org/10.1038/pr.2013.205> PMID: [24366462](#)
